1 Genome Report: *De novo* assembly of a high-quality reference genome for the Horned  
2 Lark (*Eremophila alpestris*)

3

4 Nicholas A. Mason<sup>1,2,3,\*</sup>, Paulo Pulgarin<sup>4,5</sup>, Carlos Daniel Cadena<sup>4</sup>, Irby J. Lovette<sup>1,2</sup>

5

6 1. Fuller Evolutionary Biology Program, Cornell Lab of Ornithology, Cornell University,  
7 Ithaca, New York 14850

8 2. Department of Ecology and Evolutionary Biology, Cornell University, Ithaca, New  
9 York 14853

10 3. Museum of Vertebrate Zoology, University of California, Berkeley, California, 94720

11 4. Laboratorio de Biología Evolutiva de Vertebrados, Departamento de Ciencias  
12 Biológicas, Universidad de Los Andes, Bogotá, Colombia

13 5. Facultad de Ciencias y Biotecnología, Universidad CES, Medellín, Colombia

14

15 \* Corresponding author: nmason@berkeley.edu

16

17 **Keywords:**

18 Alaudidae, ALLPATHS-LG, *Eremophila alpestris*, genome assembly, horned lark

19 **Abstract**

20 The Horned Lark (*Eremophila alpestris*) is a species of small songbird that exhibits  
21 remarkable geographic variation in appearance and habitat across an expansive  
22 distribution. While *E. alpestris* and related species have been the focus of many  
23 ecological and evolutionary studies, we still lack a highly contiguous genome assembly  
24 for horned larks and related taxa (Alaudidae). Here, we present CLO\_EAlp\_1.0, a highly  
25 contiguous assembly for horned larks generated from blood samples of a wild, male bird  
26 captured in the Altiplano Cundiboyacense of Colombia. By combining short-insert and  
27 mate-pair libraries with the ALLPATHS-LG genome assembly pipeline, we generated a  
28 1.04 Gb assembly comprised of 2708 contigs with an N50 of 10.58 Mb and a L50 of 29.  
29 After polishing the genome, we were able to identify 94.5% of single-copy gene  
30 orthologs from an Aves data set and 97.7% of single-copy gene orthologs from a  
31 vertebrata data set, indicating that our *de novo* assembly is near complete. We  
32 anticipate that this genomic resource will be useful to the broader ornithological  
33 community and those interested in studying the evolutionary history and ecological  
34 interactions of a widespread, yet understudied lineage of songbirds.

## 35 Introduction

36 The Horned Lark (*Eremophila alpestris*) is a widespread species of songbird that  
37 occupies grasslands, tundras, deserts, and other sparsely vegetated habitats on five  
38 continents (Beason 1995). As is characteristic of most species in the family Alaudidae,  
39 *E. alpestris* is a terrestrial species that nests on the ground and relies on camouflage to  
40 avoid predation by avian predators (Donald *et al.* 2017). The Horned Lark has been  
41 studied extensively in terms of geographic variation and systematics (Behle 1942;  
42 Johnson 1972), population genetics (Drovetski *et al.* 2006, 2014; Mason *et al.* 2014;  
43 Ghorbani *et al.* 2019), physiological adaptations (Trost 1972), breeding biology (de  
44 Zwaan *et al.* 2019), and responses to human activity, such as agriculture (Mason and  
45 Unitt 2018) and wind energy (Erickson *et al.* 2014), among other focal areas. Despite  
46 extensive past and ongoing research involving *E. alpestris* and other alaudids, we lack a  
47 highly contiguous reference genome for the species and the family as a whole (but see  
48 (Dierickx *et al.* 2019)). Generating genomic resources for horned larks and related taxa  
49 will enable studies linking phenotypic and genetic variation (Kratochwil and Meyer 2015;  
50 Hoban *et al.* 2016), chromosomal rearrangements (Wellenreuther and Bernatchez  
51 2018), and many other avenues of future genomic research for non-model organisms  
52 (Ellegren 2014).

53 Here, we describe CLO\_EAlp\_1.0, a new genomic assembly that we built with  
54 DNA extracted from a wild, male lark captured and from a demographically small and  
55 geographically isolated population near Toca, Boyacá, Colombia. We sampled this  
56 individual and population because it had high *a priori* likelihood of high homozygosity  
57 compared to larks elsewhere with much larger effective population sizes and variable

58 patterns of connectivity to adjacent populations. To generate this *de novo* assembly, we  
59 used the ALLPATHS-LG pipeline (Butler *et al.* 2008; Gnerre *et al.* 2011). Given the lack  
60 of genomic resources currently available for Alaudidae, we hope this *de novo* assembly  
61 will inspire and facilitate future studies on the genomic biology of larks—a widespread,  
62 diverse lineage of songbirds.

63

## 64 **Methods**

### 65 *Sample collection, DNA extraction, and sequencing*

66 We captured a male *E. alpestris* (EALPPER07; NCBI BioSample  
67 SAMN12913182) approximately 170 km NE of Bogotá, Colombia near the town of Tocá  
68 on the shores of the Embalse de La Copa in the Altiplano Cundiboyacense of the  
69 Boyacá department (5.623299° N, 73.184156° W). This population is small and  
70 represents a subspecies (*E. a. peregrina*) that is geographically isolated from other  
71 populations of larks, the nearest population of which is in Oaxaca, Mexico. The  
72 Colombian subspecies of Horned Lark underwent a population bottleneck upon  
73 colonizing the high-elevation plateaus of the region and therefore has high  
74 homozygosity, which is preferable for *de novo* genome assembly. We collected blood  
75 from the brachial vein, from which we subsequently extracted genomic DNA with a  
76 Gentra Puregene Blood Kit (Qiagen, Hilden, Germany) following the manufacturer's  
77 protocol. We confirmed the sex of the individual using PCR amplification (Chu *et al.*  
78 2015). After running the sample on a 1% agarose gel to confirm the presence of high  
79 molecular weight DNA, we sent the extraction to the Cornell Weil Medical School, where  
80 they generated a 180 bp fragment library, a 3 kb mate-pair library and a 8 kb mate-pair

81 library. We sequenced the 180 bp library across two lanes and combined the 3 kb and 8  
82 kb mate-pair libraries on another lane of Illumina HiSeq 2500 to perform 100 bp paired-  
83 end sequencing.

84

#### 85 *Genome assembly, polishing, and assessment*

86 We assembled the genome with ALLPATHS-LG v52415 (Butler *et al.* 2008;  
87 Gnerre *et al.* 2011). We did not perform additional adapter removal or quality filtering  
88 with the short-insert 180 bp libraries because ALLPATHS-LG has built-in steps that  
89 remove low quality and adapter-contaminated reads (Butler *et al.* 2008). Once the initial  
90 assembly had finished, we aligned the short-insert and mate-pair libraries back to the  
91 assembly genome using bwa 0.7.17-r1188 (Li and Durbin 2009) and samtools v1.9 (Li  
92 *et al.* 2009) and then performed three iterations of scaffold polishing using pilon v1.22  
93 (Walker *et al.* 2014) with default parameters. Once scaffold polishing had finished, we  
94 ordered and correspondingly renamed the scaffolds with respect to decreasing scaffold  
95 size using SeqKit v0.7.2 (Shen *et al.* 2016). We assessed the contiguity the *de novo*  
96 genome using QUAST v5.0.2 (Mikheenko *et al.* 2018) and estimated genome  
97 completeness with BUSCO v3 (Simão *et al.* 2015; Waterhouse *et al.* 2018) alongside  
98 HMMER v3.1b2 (Finn *et al.* 2011) and BLAST+ v2.7.1 (Camacho *et al.* 2009) to identify  
99 single-copy orthologous gene sets among birds and vertebrates.

100

#### 101 *Mitochondrial Genome Assembly*

102 We also assembled the mitochondrial genome for the same individual (EALPPER07)  
103 with NOVOplasty v3.7 (Hahn *et al.* 2013) using a ND2 sequence (GenBank Accession

104 KF743558) from a previous study (Mason *et al.* 2014) as the initial seed to begin the  
105 assembly process.

106

#### 107 *Data availability*

108 Raw output from sequencing runs and the final assembly, CLO\_EAlp\_1.0, are available  
109 from NCBI (BioProject PRJNA575884). Short-fragment and mate-pair libraries are also  
110 available from the NCBI SRA (SUB6392689). Outputs from BUSCO and QUAST  
111 analyses are available from FigShare  
112 (doi:10.6084/m9.figshare.9956063;doi:10.6084/m9.figshare.9956042).

113

## 114 **Results and Discussion**

115 Taken together, the three lanes of Illumina HiSeq 2500 sequencing generated  
116  $1.59 \times 10^9$  total reads (~134x estimated coverage of a 1.2 Gb genome), including  $5.45 \times$   
117  $10^8$  paired-end reads for the 180 bp short-insert libraries,  $1.24 \times 10^8$  paired-end reads  
118 for the 3 kb mate-pair library, and  $1.27 \times 10^8$  paired-end reads for the 8 kb mate-pair  
119 library. Following scaffold polishing, the finalized CLO\_EAlp\_1.0 assembly consisted of  
120 2708 contigs that totaled 1.04 Gb. The largest contig was 31.81 Mb while the N50 was  
121 10.58 Mb and L50 was 29 (Table 1). The average GC content was 42.23%, which is  
122 similar to other birds (Jarvis *et al.* 2014; Botero-Castro *et al.* 2017), while the *de novo*  
123 genome assembly included 94.5% of single-copy orthologs from the Aves data set and  
124 97.7% of the Vertebrata data set as identified by BUSCO (Table 2).

125 We opted not to assemble pseudochromosomes by aligning our *de novo* genome  
126 to an existing chromosome-level genome assembly (e.g., Zebra Finch (*Taeniopygia*

127 *guttata*). While birds generally exhibit strong synteny (Derjusheva *et al.* 2004), avian sex  
128 chromosomes and microchromosomes are often comprised of extensive  
129 rearrangements (Volker *et al.* 2010). Thus, there is room to improve scaffolds generated  
130 in this assembly so that they match full chromosomes through strategies such as Hi-C  
131 (Burton *et al.* 2013) or ultra-long read sequencing technology (Ma *et al.* 2018).  
132 Functional annotation could also be improved by generating RNA-Seq and protein  
133 libraries for larks (Denoeud *et al.* 2008). Thus, while there is room to improve this  
134 current assembly, CLO\_EAlp\_1.0 represents a large step forward toward leveraging the  
135 natural history of larks and advanced sequencing technology to further understand  
136 avian biology.

137

### 138 **Acknowledgements**

139 We would like to thank Bronwyn Butcher for assistance with lab work. Leonardo  
140 Campana gave advice on genome assembly and bioinformatics. Thanks to Diana  
141 Carolina Macana for her assistance with field work. This research was supported by a  
142 Doctoral Dissertation Improvement Grant from the National Science Foundation (DEB-  
143 1601072) to NAM.

144

### 145 **Author Contributions**

146 NAM, PP, and CDC conducted field work. NAM performed lab work, genomic assembly,  
147 and analyses. NAM wrote the paper with input from PP, CDC, and IJL. All authors read  
148 and approved the final manuscript. The authors declare that they have no competing  
149 interests. The funding sponsors had no role in the design of the study; in the collection,

150 analyses, or interpretation of data; in the manuscript writing, and in the publication

151 decision.

152

153



154 **References**

- 155 Beason, R. C., 1995 Horned Lark (*Eremophila alpestris*), version 2.0. In *The Birds of*  
156 *North America* (A. F. Poole and F. B. Gill, Editors).
- 157 Behle, W., 1942 Distribution and variation of the Horned Larks (*Eremophila alpestris*) of  
158 western North America. *University of California Publications in Zoology* 46: 203–  
159 316.
- 160 Botero-Castro, F., E. Figuet, M.-K. Tilak, B. Nabholz, and N. Galtier, 2017 Avian  
161 genomes revisited: hidden genes uncovered and the rates versus traits paradox  
162 in birds. *Molecular Biology and Evolution* 34: 3123–3131.
- 163 Burton, J. N., A. Adey, R. P. Patwardhan, R. Qiu, J. O. Kitzman et al., 2013  
164 Chromosome-scale scaffolding of de novo genome assemblies based on  
165 chromatin interactions. *Nature Biotechnology* 31: 1119–1125.
- 166 Butler, J., I. MacCallum, M. Kleber, I. A. Shlyakhter, M. K. Belmonte et al., 2008  
167 ALLPATHS: De novo assembly of whole-genome shotgun microreads. *Genome*  
168 *Research* 18: 810–820.
- 169 Camacho, C., G. Coulouris, V. Avagyan, N. Ma, J. Papadopoulos et al., 2009 BLAST+:  
170 architecture and applications. *BMC Bioinformatics* 10: 421.
- 171 Chu, H., X. Guo, Y. Zeng, X. Zou, S. Guo et al., 2015 A new primer-pair for sex  
172 identification of larks and wagtails. *Conservation Genetic Resources* 7: 19–21.
- 173 Denoeud, F., J.-M. Aury, C. Da Silva, B. Noel, O. Rogier et al., 2008 Annotating  
174 genomes with massive-scale RNA sequencing. *Genome Biology* 9: R175.

- 175 Derjusheva, S., A. Kurganova, F. Habermann, and E. Gaginskaya, 2004 High  
176 chromosome conservation detected by comparative chromosome painting in  
177 chicken, pigeon and passerine birds. *Chromosome Research* 12: 715–723.
- 178 Dierickx, E., S. Sin, P. van Veelen, M. de L. Brooke, Y. Liu et al., 2019 Neo-sex  
179 chromosomes and demography shape genetic diversity in the Critically  
180 Endangered Raso lark: Genomics preprint <https://doi.org/10.1101/617563>
- 181 Donald, P. F., P. Alström, and D. Engelbrecht, 2017 Possible mechanisms of substrate  
182 colour-matching in larks (Alaudidae) and their taxonomic implications. *Ibis* 159:  
183 699–702.
- 184 Drovetski, S. V., S. F. Pearson, and S. Rohwer, 2006 Streaked horned lark *Eremophila*  
185 *alpestris strigata* has distinct mitochondrial DNA. *Conservation Genetics* 6:  
186 875–883.
- 187 Drovetski, S. V., M. Raković, G. Semenov, I. V. Fadeev, and Y. A. Red'kin, 2014  
188 Limited phylogeographic signal in sex-linked and autosomal loci despite  
189 geographically, ecologically, and phenotypically concordant structure of mtDNA  
190 variation in the Holarctic avian genus *Eremophila* (D. Mishmar, Ed.). *PLoS ONE*  
191 9: e87570.
- 192 Ellegren, H., 2014 Genome sequencing and population genomics in non-model  
193 organisms. *Trends in Ecology & Evolution* 29: 51–63.
- 194 Erickson, W. P., M. M. Wolfe, K. J. Bay, D. H. Johnson, and J. L. Gehring, 2014 A  
195 comprehensive analysis of small-passerine fatalities from collision with turbines  
196 at wind energy facilities (R. M. Brigham, Ed.). *PLoS ONE* 9: e107491.

- 197 Finn, R. D., J. Clements, and S. R. Eddy, 2011 HMMER web server: interactive  
198 sequence similarity searching. *Nucleic Acids Research* 39: W29–W37.
- 199 Ghorbani, F., M. Aliabadian, U. Olsson, P. F. Donald, A. A. Khan et al., 2019  
200 Mitochondrial phylogeography of the genus *Eremophila* confirms underestimated  
201 species diversity in the Palearctic. *J Ornithol.* In press.
- 202 Gnerre, S., I. MacCallum, D. Przybylski, F. J. Ribeiro, J. N. Burton et al., 2011 High-  
203 quality draft assemblies of mammalian genomes from massively parallel  
204 sequence data. *Proceedings of the National Academy of Sciences* 108: 1513–  
205 1518.
- 206 Hahn, C., L. Bachmann, and B. Chevreur, 2013 Reconstructing mitochondrial genomes  
207 directly from genomic next-generation sequencing reads—a baiting and iterative  
208 mapping approach. *Nucleic Acids Research* 41: e129–e129.
- 209 Hoban, S., J. L. Kelley, K. E. Lotterhos, M. F. Antolin, G. Bradburd et al., 2016 Finding  
210 the genomic basis of local adaptation: pitfalls, practical solutions, and future  
211 directions. *The American Naturalist* 188: 379–397.
- 212 Jarvis, E. D., S. Mirarab, A. J. Aberer, B. Li, P. Houde et al., 2014 Whole-genome  
213 analyses resolve early branches in the tree of life of modern birds. *Science* 346:  
214 1320–1331.
- 215 Johnson, N. K., 1972 Origin and differentiation of the avifauna of the Channel Islands,  
216 California. *The Condor* 74: 295–315.
- 217 Kratochwil, C. F., and A. Meyer, 2015 Closing the genotype-phenotype gap: emerging  
218 technologies for evolutionary genetics in ecological model vertebrate systems:  
219 Prospects & Overviews. *BioEssays* 37: 213–226.

- 220 Li, H., and R. Durbin, 2009 Fast and accurate short read alignment with Burrows-  
221 Wheeler transform. *Bioinformatics* 25: 1754–1760.
- 222 Li, H., B. Handsaker, A. Wysoker, T. Fennell, J. Ruan et al., 2009 The sequence  
223 alignment/map format and SAMtools. *Bioinformatics* 25: 2078–2079.
- 224 Ma, Z. (Sam), L. Li, C. Ye, M. Peng, and Y.-P. Zhang, 2018 Hybrid assembly of ultra-  
225 long Nanopore reads augmented with 10x-Genomics contigs: D\ demonstrated  
226 with a human genome. *Genomics* S0888754318305603.
- 227 Mason, N. A., P. O. Title, C. Cicero, K. J. Burns, and R. C. K. Bowie, 2014 Genetic  
228 variation among western populations of the Horned Lark (*Eremophila alpestris*)  
229 indicates recent colonization of the Channel Islands off southern California,  
230 mainland-bound dispersal, and postglacial range shifts. *The Auk* 131: 162–174.
- 231 Mason, N. A., and P. Unitt, 2018 Rapid phenotypic change in a native bird population  
232 following conversion of the Colorado Desert to agriculture. *J Avian Biol* 49: jav-  
233 01507.
- 234 Mikheenko, A., A. Prjibelski, V. Saveliev, D. Antipov, and A. Gurevich, 2018 Versatile  
235 genome assembly evaluation with QUAST-LG. *Bioinformatics* 34: i142–i150.
- 236 Shen, W., S. Le, Y. Li, and F. Hu, 2016 SeqKit: A Cross-platform and ultrafast toolkit for  
237 FASTA/Q File Manipulation (Q. Zou, Ed.). *PLoS ONE* 11: e0163962.
- 238 Simão, F. A., R. M. Waterhouse, P. Ioannidis, E. V. Kriventseva, and E. M. Zdobnov,  
239 2015 BUSCO: assessing genome assembly and annotation completeness with  
240 single-copy orthologs. *Bioinformatics* 31: 3210–3212.
- 241 Trost, C. H., 1972 Adaptations of Horned Larks (*Eremophila alpestris*) to hot  
242 environments. *The Auk* 89: 506–527.

- 243 Volker, M., N. Backstrom, B. M. Skinner, E. J. Langley, S. K. Bunzey et al., 2010 Copy  
244 number variation, chromosome rearrangement, and their association with  
245 recombination during avian evolution. *Genome Research* 20: 503–511.
- 246 Walker, B. J., T. Abeel, T. Shea, M. Priest, A. Abouelliel et al., 2014 Pilon: An Integrated  
247 Tool for Comprehensive Microbial Variant Detection and Genome Assembly  
248 Improvement (J. Wang, Ed.). *PLoS ONE* 9: e112963.
- 249 Waterhouse, R. M., M. Seppey, F. A. Simão, M. Manni, P. Ioannidis et al., 2018 BUSCO  
250 applications from quality assessments to gene prediction and phylogenomics.  
251 *Molecular Biology and Evolution* 35: 543–548.
- 252 Wellenreuther, M., and L. Bernatchez, 2018 Eco-evolutionary genomics of  
253 chromosomal inversions. *Trends in Ecology & Evolution* 33: 427–440.
- 254 de Zwaan, D. R., S. Barnes, and K. Martin, 2019 Plumage melanism is linked to male  
255 quality, female parental investment and assortative mating in an alpine songbird.  
256 *Animal Behaviour* 156: 41–49.
- 257

258 Table 1: De novo genome assembly metrics estimated using QUAST.

259

| Assembly Statistic | CLO_EAlp_1.0 |
|--------------------|--------------|
| # contigs          | 2708         |
| Largest contig     | 31807647     |
| Total length       | 1041026391   |
| GC (%)             | 42.23        |
| N50 (bp)           | 10588015     |
| N75 (bp)           | 3940266      |
| L50                | 29           |
| L75                | 70           |
| # N's per 100 kbp  | 3472.39      |

260

261

262 Table 2: Output from BUSCO analyses to assess genome completeness by searching  
263 for single-copy orthologs from aves and vertebrata datasets.

264

|                                 | Aves         | Vertebrata   |
|---------------------------------|--------------|--------------|
| Complete BUSCOs                 | 4645 (94.5%) | 2530 (97.7%) |
| Complete and single-copy BUSCOs | 4590 (93.4%) | 2518 (97.4%) |
| Complete and duplicated BUSCOs  | 55 (1.1%)    | 12 (0.5%)    |
| Fragmented BUSCOs               | 162 (3.3%)   | 36 (1.4%)    |
| Missing BUSCOs                  | 108 (2.2%)   | 20 (0.7%)    |
| Total BUSCO groups searched     | 4915         | 2586         |

265
